# Supplementary material for: A data-driven algorithm to determine 1H-MRS basis set composition
Source: PubMed Central journal article supplement — bioRxiv. 2025 Jun 22:2024.09.11.612503. Originally published 2024 Sep 15. Preprint. [Version 3] doi: 10.1101/2024.09.11.612503 (PMC11419043; doi:10.1101/2024.09.11.612503), 2025-06-22

| Basis function | linewidth | Peak frequency | Amplitude       |
|----------------|-----------|----------------|-----------------|
|                | [Hz]      | [ppm]          | [1-proton area] |
| MM09           | 0.14      | 0.91           | 3               |
| MM12           | 0.15      | 1.21           | 2               |
| MM14           | 0.17      | 1.43           | 2               |
| MM17           | 0.15      | 1.67           | 2               |
| MM20           | 0.15      | 2.08           | 1.33            |
|                | 0.2       | 2.25           | 0.33            |
|                | 0.15      | 1.95           | 0.33            |
|                | 0.2       | 3              | 0.4             |
| Lip09          | 0.14      | 0.89           | 3               |
| Lip13          | 0.15      | 1.28           | 2               |
|                | 0.89      | 1.28           | 2               |
| Lip20          | 0.15      | 2.04           | 1.33            |
|                | 0.15      | 2.25           | 0.67            |
|                | 0.2       | 2.8            | 0.87            |

**Supplementary Table 1.** The width, center frequency, and relative amplitude of the parameterized lipid and MM resonances we included in the basis set. Specific values were based on the LCMoDel parameterizations of these signals.

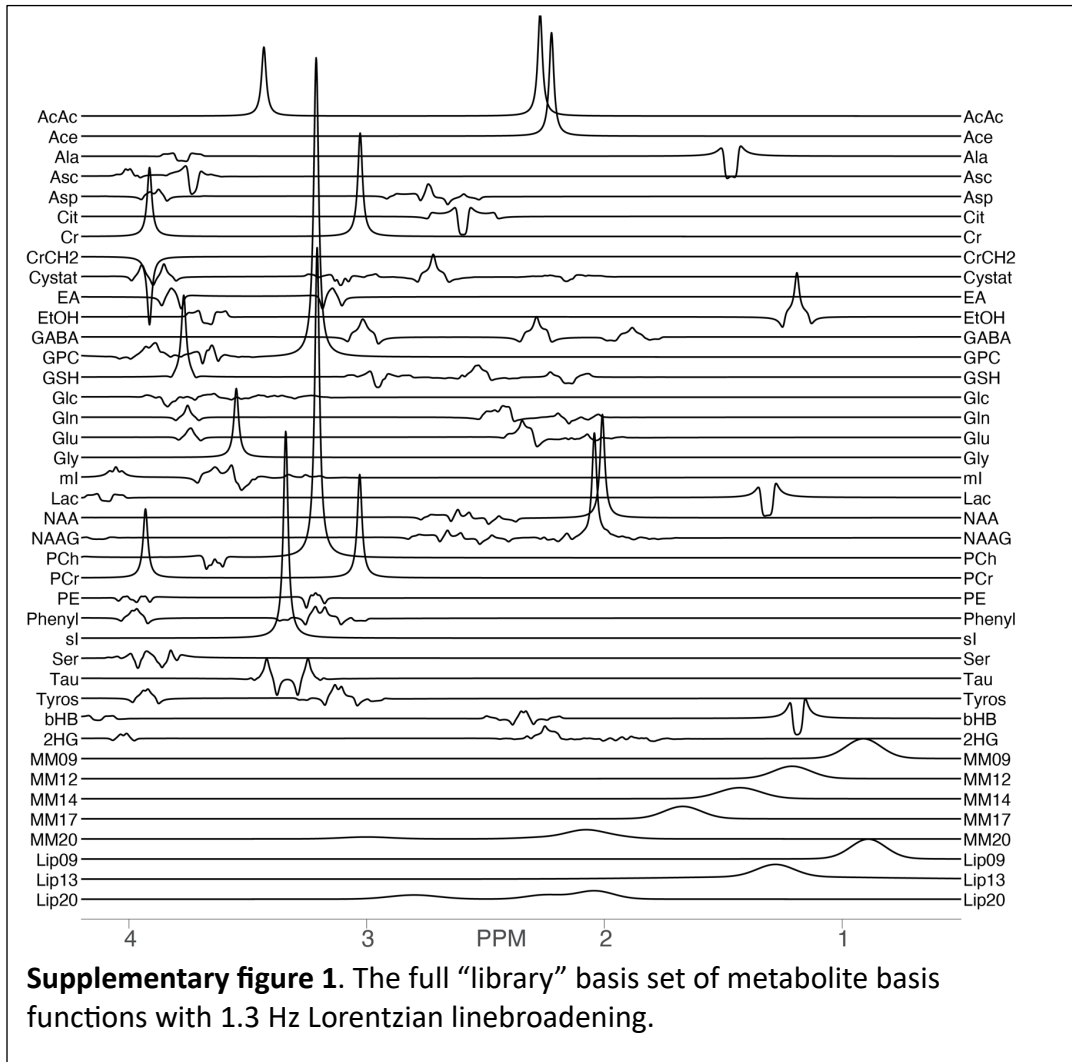

|           |                                | Healthy        | Tumor          |
|-----------|--------------------------------|----------------|----------------|
| Amplitude | Gaussian linebroadening [Hz]   | 7.44 ± 0.56    | 7.74 ± 0.62    |
|           | Lorentzian linebroadening [Hz] | 2.36 ± 0.31    | 2.44 ± 0.36    |
|           | SNR                            | 223.15 ± 67.06 | 229.75 ± 56.67 |
|           | Asc                            | 0.36 ± 0.28    | 0.42 ± 0.31    |
|           | Asp                            | 1.46 ± 0.36    | 1.51 ± 0.36    |
|           | Cr                             | 3.82 ± 1.01    | 4.02 ± 0.79    |
|           | CrCH2                          | 0.91 ± 0.52    | 0.88 ± 0.56    |
|           | GABA                           | 0.86 ± 0.43    | 0.87 ± 0.48    |
|           | GPC                            | 0.59 ± 0.37    | 0.83 ± 0.24    |
|           | GSH                            | 1.45 ± 0.45    | 1.33 ± 0.46    |
|           | Gln                            | 1.44 ± 0.79    | 1.36 ± 0.91    |
|           | Glu                            | 5.75 ± 1.88    | 5.72 ± 0.95    |
|           | Lac                            | 0.50 ± 0.34    | 3.62 ± 0.50    |
|           | NAA                            | 8.89 ± 1.42    | 3.50 ± 1.00    |
|           | NAAG                           | 0.95 ± 0.42    | 0.78 ± 0.68    |
|           | PCh                            | 0.47 ± 0.26    | 1.35 ± 0.22    |
|           | PCr                            | 2.36 ± 1.26    | 1.99 ± 0.91    |
|           | PE                             | 1.76 ± 0.65    | 1.82 ± 0.62    |
|           | Tau                            | 1.31 ± 0.76    | 1.12 ± 0.81    |
|           | ml                             | 5.28 ± 0.99    | 7.01 ± 1.10    |
|           | sl                             | 0.18 ± 0.13    | 0.17 ± 0.12    |
|           | Cystat                         | 0              | 3.22 ± 2.10    |
|           | 2HG                            | 0              | 3.55 ± 2.25    |
|           | Lip09                          | 1.19 ± 0.51    | 7.61 ± 0.59    |
|           | Lip13                          | 1.58 ± 0.60    | 1.56 ± 0.69    |
|           | Lip20                          | 0.37 ± 0.18    | 2.59 ± 0.19    |
|           | MM09                           | 1.99 ± 0.79    | 2.02 ± 0.97    |
| MM12      | 0.71 ± 0.58                    | 0.64 ± 0.45    |                |
| MM14      | 1.76 ± 1.17                    | 1.68 ± 1.10    |                |
| MM17      | 0.62 ± 0.43                    | 0.67 ± 0.45    |                |
| MM20      | 2.14 ± 1.01                    | 2.25 ± 0.99    |                |

**Supplementary Table 2.** Ground truth simulation parameters (mean ± standard deviation) used to derive the healthy-appearing spectra (left column) and low-grade glioma, “tumor” spectra (right column). The top three rows show the Gaussian and Lorentzian linebroadening terms and the SNR, with subsequent rows showing the metabolite-specific amplitudes.

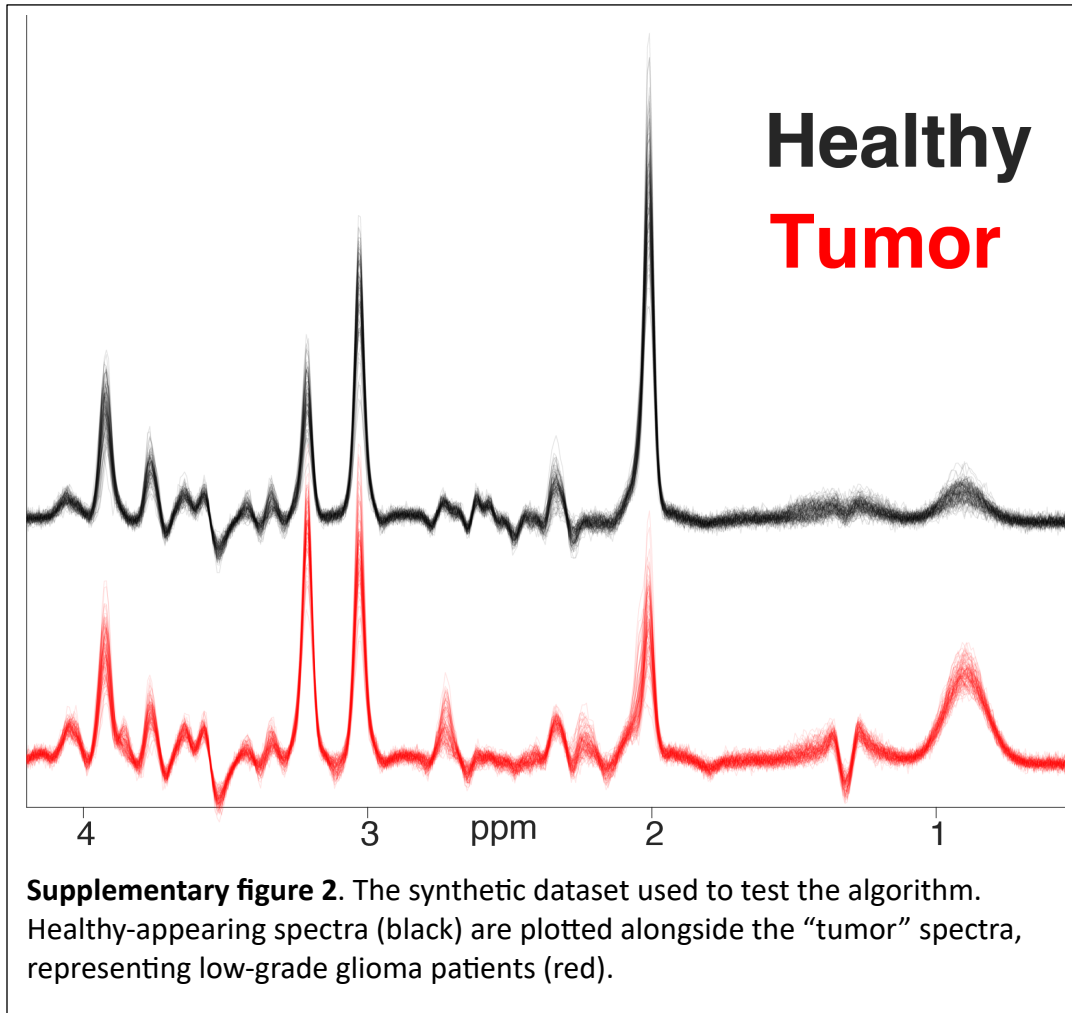

Supplement: NIHPP2024.09.11.612503v1-supplement-1.pdf [file NIHPP2024.09.11.612503v1-supplement-1.pdf]
